# Supplementary material for: Hydrothermal synthesis of (00l) epitaxial BiFeO3 films on SrTiO3 substrate
Source: Royal Society of Chemistry journal article supplement (doi:10.1039/c002287j), 2010-01-01
Supplement: c002287j.pdf [file c002287j.pdf]

### Supporting Information (1)

Calculated powder yield data of BFO obtained at different processing (a) temperatures and (b) times.

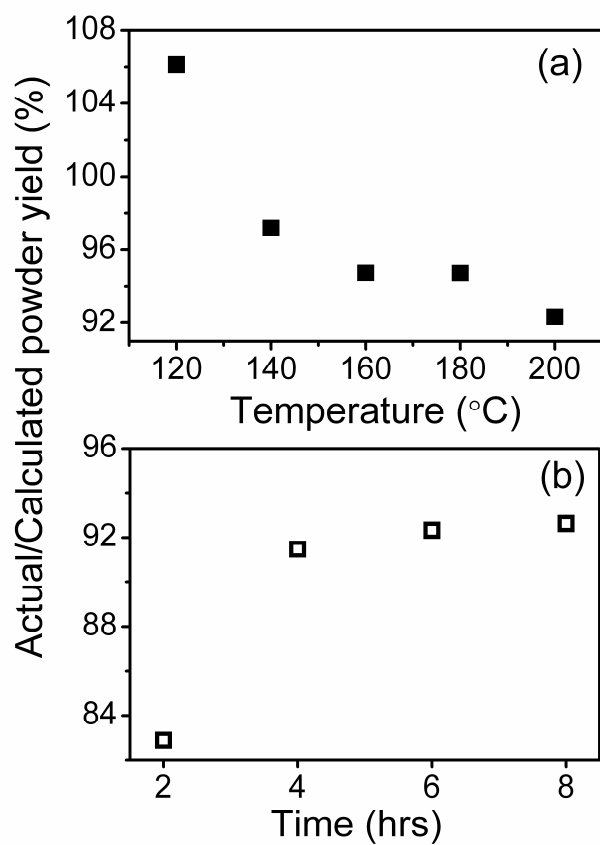

## Supporting Information (2)

Lattice parameters by LeBail fittings of the peak from the out-of planes and in-planes BFO(122) and BFO(128) in *Cm* space group, from which  $a_{PC}$ ,  $b_{PC}$ ,  $c_{PC}$  and  $d(100)$  tabulated in text Table 1 are calculated based on  $a_{PC} = a_M / \sqrt{2}$ ,  $b_{PC} = b_M / \sqrt{2}$ ,  $c_{PC} = c_M$ ,  $V_{PC} = V_M / 2$ , and  $d(100) = \frac{\sqrt{(a_{PC}^2 + b_{PC}^2)}}{2}$ .

| Temp (°C) | Time (h)    | BFO film lattice parameters ( <i>Cm</i> monoclinic) |           |           |             |                             |
|-----------|-------------|-----------------------------------------------------|-----------|-----------|-------------|-----------------------------|
|           |             | $a_M$ (Å)                                           | $b_M$ (Å) | $c_M$ (Å) | $\beta$ (°) | Vol, $V_M$ (Å) <sup>3</sup> |
| 120       | 6           | 5.4233(4)                                           | 5.644(1)  | 3.9722(2) | 88.34(1)    | 121.54(2)                   |
| 140       | 6           | 5.4897(3)                                           | 5.6386(3) | 3.9750(2) | 89.239(2)   | 123.03(1)                   |
| 160       | 6           | 5.4612(5)                                           | 5.5814(6) | 3.9723(4) | 89.362(6)   | 121.07(2)                   |
| 180       | 6           | 5.483(1)                                            | 5.662(1)  | 3.9819(3) | 89.14(1)    | 123.60(1)                   |
| 200       | 6           | 5.488(1)                                            | 5.695(1)  | 3.9658(2) | 89.13(1)    | 123.93(2)                   |
| 200       | 6 (+anneal) | 5.4812(3)                                           | 5.6348(4) | 3.9597(1) | 89.22(1)    | 122.28(1)                   |
| 200       | 2           | 5.583(1)                                            | 5.602(1)  | 3.9682(2) | 89.07(2)    | 124.09(4)                   |
| 200       | 4           | 5.4909(2)                                           | 5.674(1)  | 3.9607(1) | 89.16(1)    | 123.38(1)                   |
| 200       | 8           | 5.5558(1)                                           | 5.5854(2) | 3.9598(1) | 88.762(4)   | 122.85(1)                   |

### Supporting Information (3)

Lattice parameters by Rietveld refinements of the BFO powders obtained at different processing temperatures and times in R3c space group, from which  $a_{\text{bulk-PC}}$  and  $V_{\text{PC}}$  tabulated in text Table 1 are calculated based on  $a_{\text{bulkPC}} = a_{\text{R}}/\sqrt{2}$  and  $V_{\text{PC}} = (a_{\text{R}}/\sqrt{2})^3$ .

| Temp.(°C) | Time (h) | BFO powder lattice parameters |                |                                           |
|-----------|----------|-------------------------------|----------------|-------------------------------------------|
|           |          | R3c Rhombohedral              |                |                                           |
|           |          | $a_{\text{R}}$                | $c_{\text{R}}$ | Volume, $V_{\text{R}}$ ( $\text{\AA}^3$ ) |
| 120       | 6        | 5.614(4)                      | 13.68(2)       | 373.14(7)                                 |
| 140       | 6        | 5.5823(4)                     | 13.875(1)      | 374.44(6)                                 |
| 160       | 6        | 5.5804(3)                     | 13.838(1)      | 373.19(5)                                 |
| 180       | 6        | 5.5801(2)                     | 13.843(7)      | 373.32(4)                                 |
| 200       | 6        | 5.5868(4)                     | 13.862(1)      | 373.99(2)                                 |
| 200       | 2        | 5.5801(2)                     | 13.844(1)      | 374.25(8)                                 |
| 200       | 4        | 5.5787(3)                     | 13.855(1)      | 373.42(5)                                 |
| 200       | 8        | 5.5820(2)                     | 13.869(1)      | 374.25(3)                                 |
